# Supplementary material for: Time course of phosphorylated-tau181 in blood across the Alzheimer’s disease spectrum
Source: PubMed Central journal article supplement — Brain. 2020 Nov 30;144(1):325–39. doi: 10.1093/brain/awaa399 (PMC7880671; doi:10.1093/brain/awaa399), 2020-11-30

## Supplementary Material

**Supplementary Figure 1.** Distribution of baseline plasma p-tau181 levels. Enclosed in red circles are the four outlier measurements (121, 124, 148, and 451 pg/ml) that were excluded from analyses.

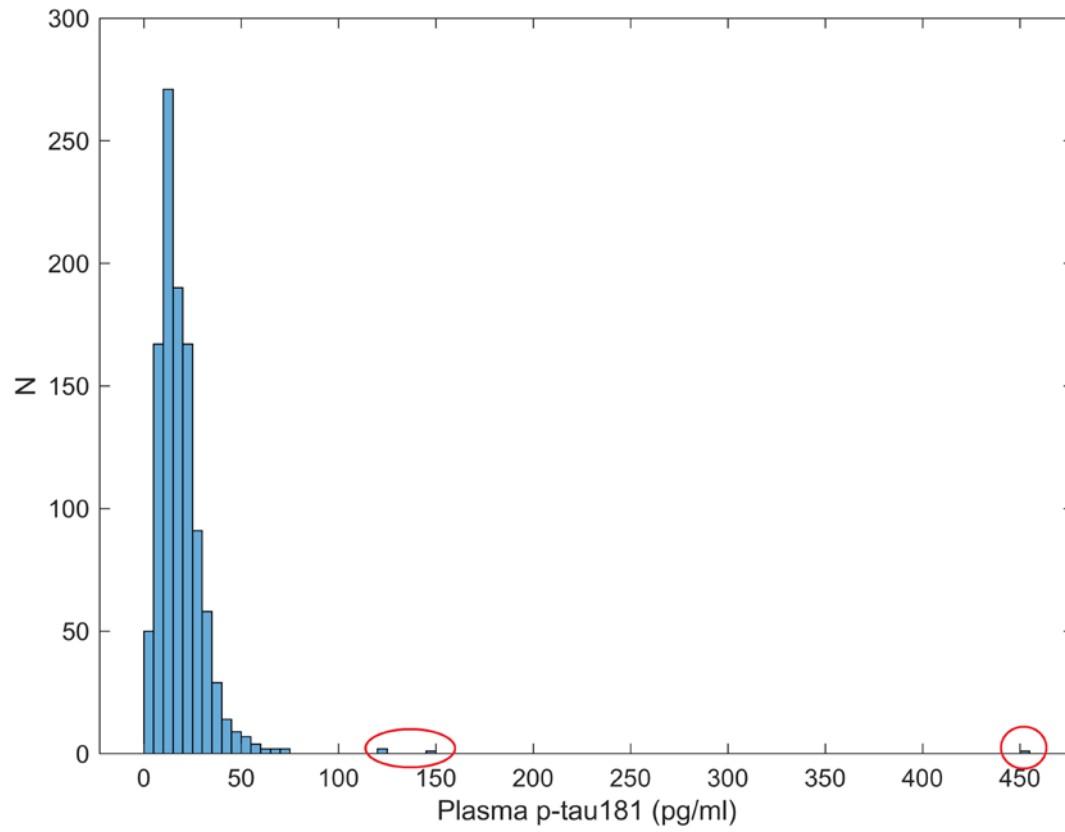

**Supplementary Figure 2.** Axial slices showing association maps in the striatum between baseline plasma p-tau181 and baseline FBP SUVR for CN, MCI, and Alzheimer's disease dementia (AD) participants. Models were adjusted for age and sex.

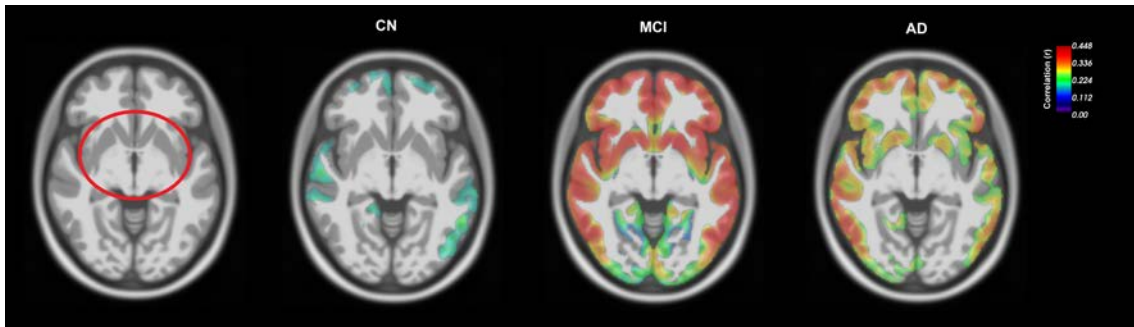

**Supplementary Figure 3.** Axial slices showing association maps in the striatum between FBP SUVR change and A) baseline plasma p-tau181, B) plasma p-tau181 change. Models were adjusted for age and sex.

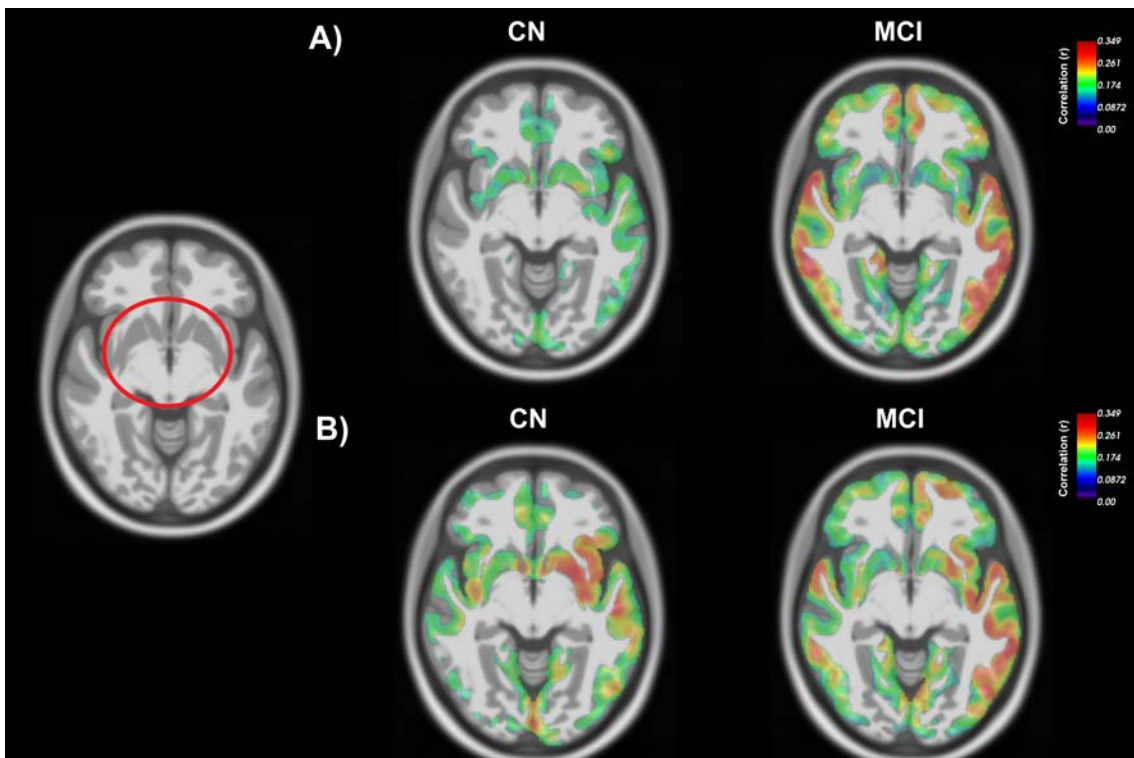

**Supplementary Figure 4.** Regional associations of plasma p-tau181 with PET-measured A $\beta$  deposition and longitudinal accumulation among A $\beta$ + subjects. Voxel-wise analyses (adjusted for age and sex) assessing regional associations between (A) baseline plasma p-tau181 levels and baseline FBP SUVR, (B) baseline plasma p-tau181 levels and FBP SUVR change, and (C) plasma p-tau181 change and FBP SUVR change for both CN and cognitively impaired individuals. Significant associations in voxel-wise analyses were determined based on a family-wise error (FWE)-corrected threshold of  $p < 0.05$  at the cluster level, with initial voxel-level height thresholds of  $p < 0.05$ . No significant associations were found among A $\beta$ - subjects. CI: Cognitively impaired.

**A. Baseline plasma p-tau181 vs Baseline FBP PET**

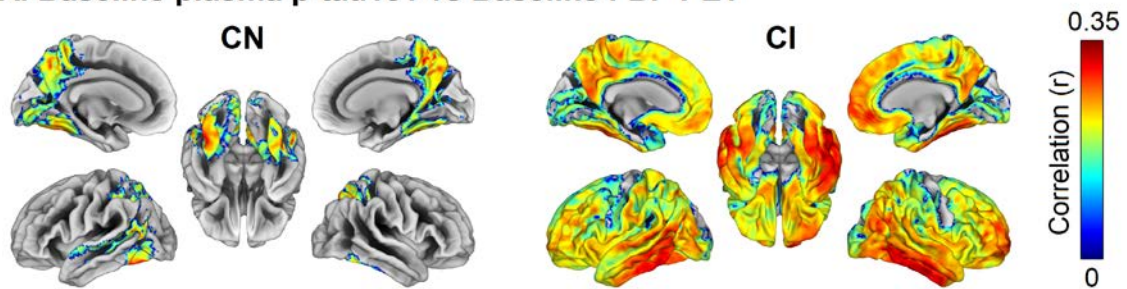

**B. Baseline plasma p-tau181 vs FBP PET change**

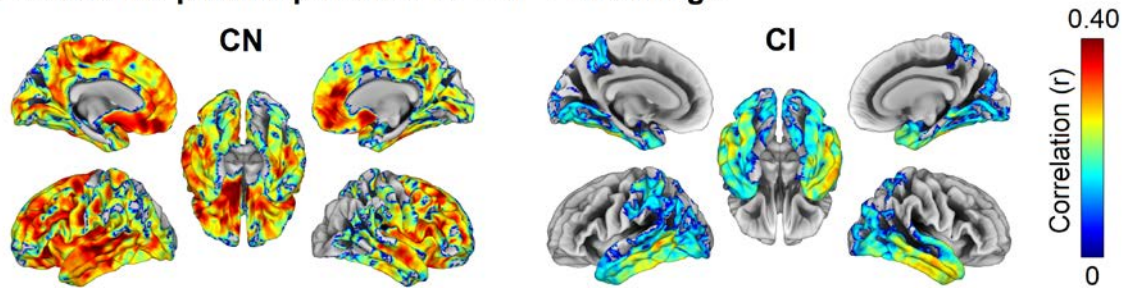

**C. Plasma p-tau181 change vs FBP PET change**

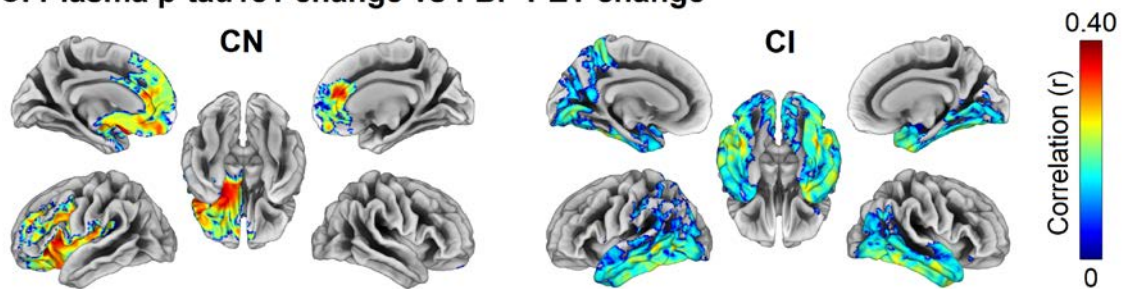

**Supplementary Figure 5.** Baseline and longitudinal associations of plasma p-tau181 with imaging and CSF biomarkers of global A $\beta$  pathology, according to cognitive status. Spline regressions, fit separately for CU and CI individuals, describe the statistical dependence of baseline levels of plasma p-tau181 (A and C) and longitudinal change in plasma p-tau181 (B and D) on CSF A $\beta$ 1-42 levels (A and B) and Centiloids (C and D). Shaded areas are 95% confidence intervals for the fit. Spline fits suggest that the association of plasma p-tau181 with A $\beta$  markers was stronger among CI individuals (non-overlapping 95% confidence bounds in the abnormal amyloid biomarker range). CU: Cognitively unimpaired, cognitively normal (CN). CI: Cognitively impaired (MCI+AD).

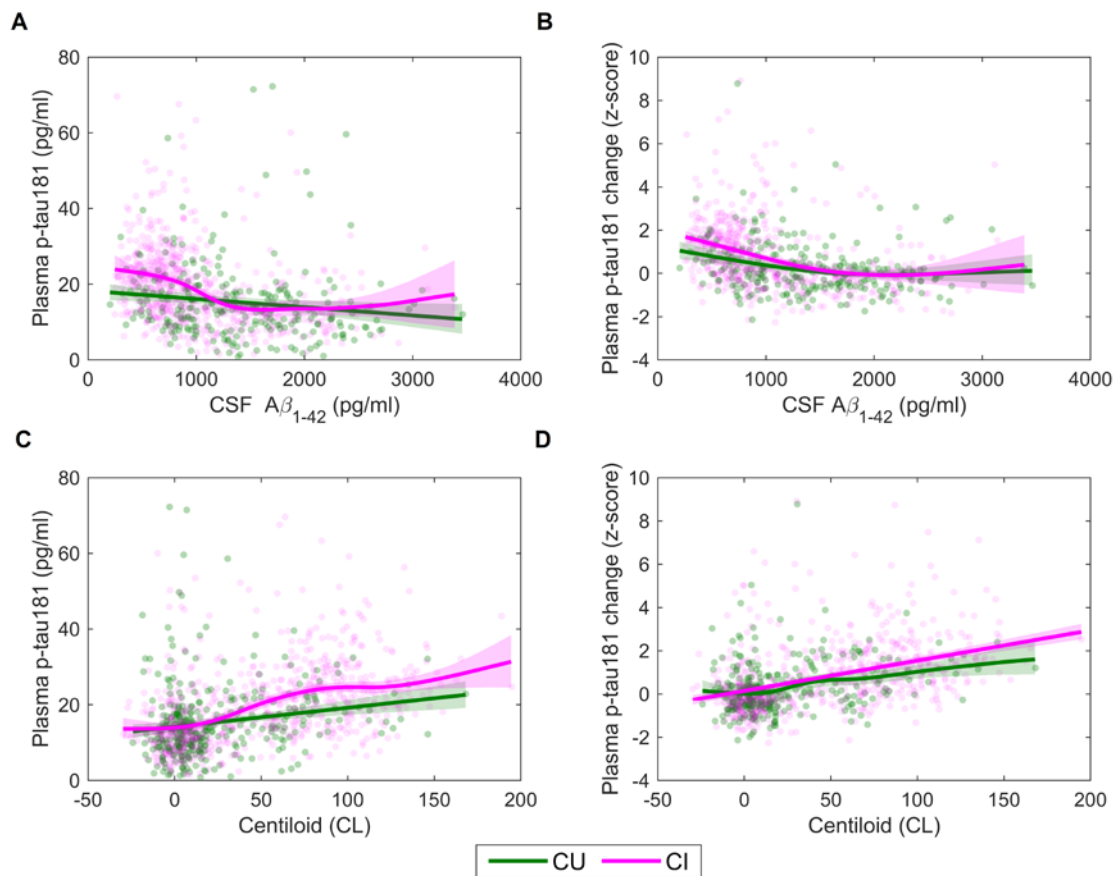

**Supplementary Figure 6.** Baseline and longitudinal associations of plasma p-tau181 with PET and CSF biomarkers of global A $\beta$  pathology, according to A $\beta$  status. Spline regressions, fit separately for A $\beta$ + and A $\beta$ - individuals, describe the statistical dependence of baseline levels of plasma p-tau181 (A and C) and longitudinal change in plasma p-tau181 (B and D) on CSF A $\beta$ 1-42 levels and Centiloids (C and D). Shaded areas are 95% confidence intervals for the fit. Spline fits and Spearman rhos suggest that the association of plasma p-tau181 with A $\beta$  markers was only present among A $\beta$ + subjects.

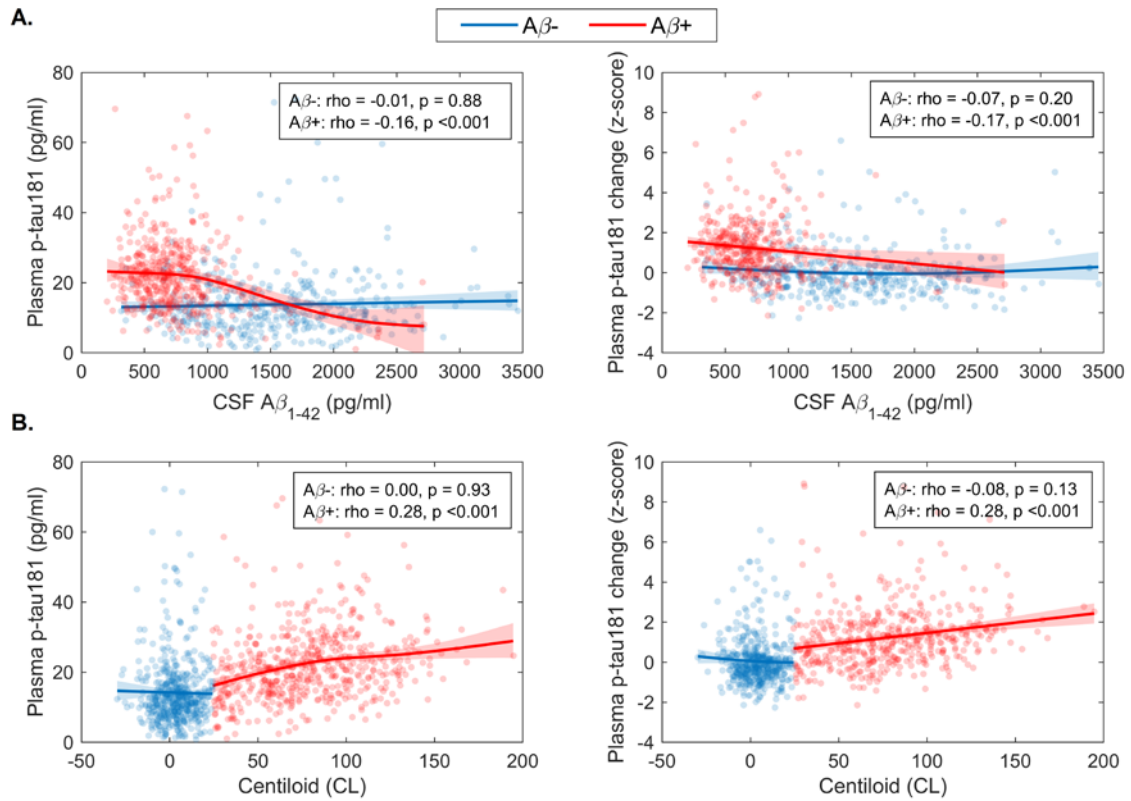

**Supplementary Figure 7.** Baseline and longitudinal associations between plasma p-tau181 and CSF p-tau181 among A $\beta$ + subjects, according to cognitive status. Spline regressions describing the statistical dependence of baseline levels of plasma p-tau181 (A) and plasma p-tau181 change (B) on CSF p-tau181 levels, as well as plasma p-tau181 change vs CSF p-tau181 change (C). Z-scores were computed using A $\beta$ - CN levels as the reference. Shaded areas are 95% confidence intervals for the fit. Spline fits suggest that the relationship between p-tau181 in plasma and in CSF is not modified by cognitive status (overlapping 95% confidence intervals over the entire shared range). CU: Cognitively unimpaired, cognitively normal (CN). CI: Cognitively impaired (MCI+AD).

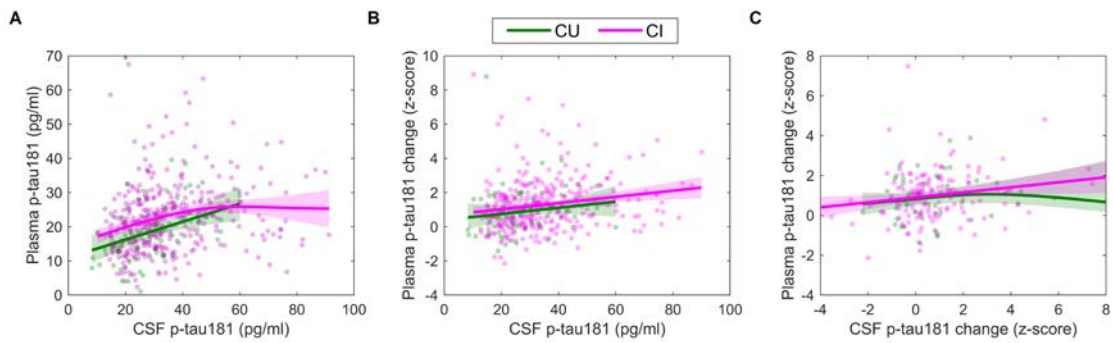

**Supplementary Figure 8.** Within-subject trajectories of plasma p-tau181 accumulation as a function of time from baseline. Regression lines were estimated using the mean slope as determined by the previously derived linear mixed model.

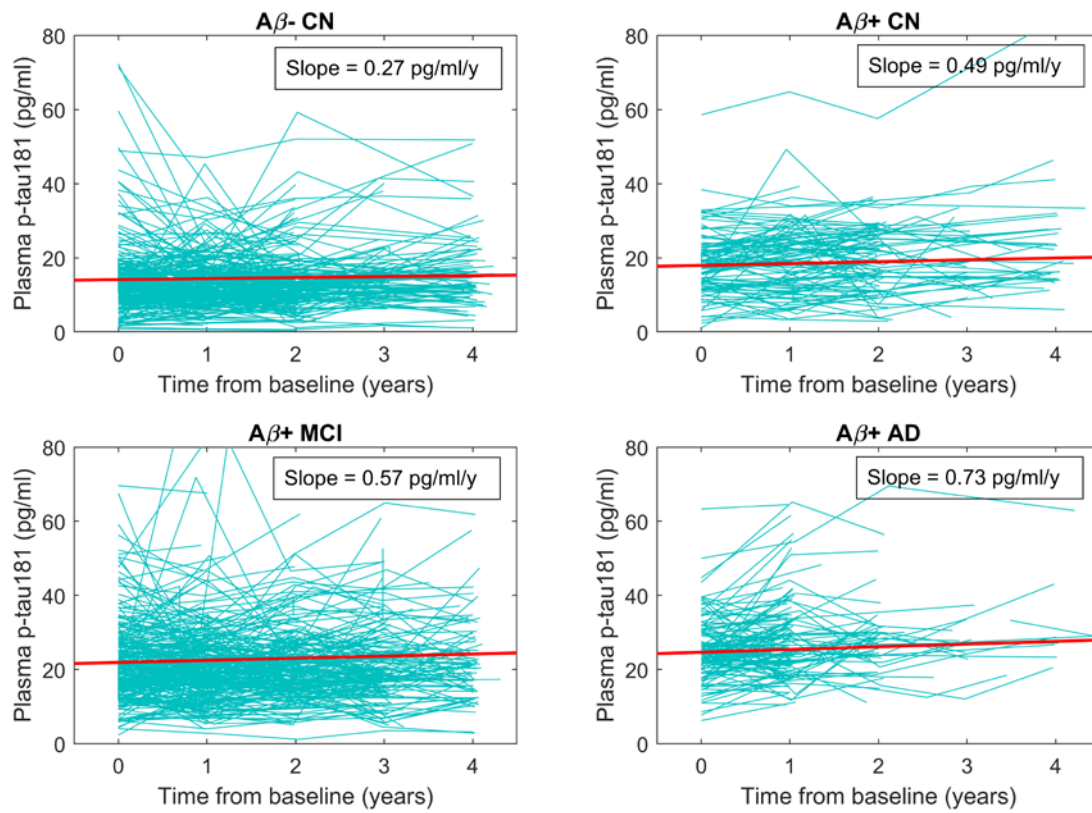

Supplement: awaa399_supplementary_data.pdf [file awaa399_supplementary_data.pdf]
